# Supplementary material for: A Molecular Dynamics Study of the Influence of Low-Dosage Methanol on Hydrate Formation in Seawater and Pure Water Metastable Solutions of Methane
Source: Preprints.org preprint supplement (doi:10.20944/preprints202408.2176.v1), 2024-08-30
Supplement: Supplementary file 1 [file supplementary]

**A molecular dynamics study of the influence of low-dosage methanol on hydrate formation in seawater and pure water metastable solutions of methane**

Rodion V. Belosludova,*, Kirill V. Getsb,c, Ravil K. Zhdanovb,c, Yulia Y. Bozhkob,c,
Vladimir R. Belosludovb,c,

*aInstitute for Materials Research, Tohoku University, 980-8577 Sendai, Japan*

*bNikolaev Institute of Inorganic Chemistry, Siberian Branch, Russian Academy of Sciences, Novosibirsk, 630090 Russia*

*cNovosibirsk State University, Novosibirsk, 630090 Russia*

****e-mail:*** *rodion@tohoku.ac.jp;*

|  |  |
| --- | --- |
| (**a**) | (**b**) |
|  |  |
| (**c**) | (**d**) |
| **Figure S1.** Time dependence of the the normalized numbers of (**a**,**b**) hydrogen bonds *NH-bond/NMol* and (**c**,**d**) long-lived hydrogen bonds *NLLHb/NMol* in (**a**,**c**) pure and (**b**,**d**) seawater-based solutions. | |

|  |  |
| --- | --- |
| (**a**) | (**b**) |
|  |  |
| (**c**) | (**d**) |
| **Figure 2S.** Time dependence of the order parameters (**a**,**b**) *F3* and (**c**,**d**) *F4* in methane solutions based on (**a**,**c**) pure and (**b**,**d**) sea water. | |

|  |  |
| --- | --- |
| (**a**) | (**b**) |
| **Figure 3S.** Time dependence of the number of cavities *NCav* in solutions based on (**a**) pure and (**b**) sea water. | |
